# Supplementary material for: Antibodies to Pseudogymnoascus destructans are not sufficient for protection against white-nose syndrome
Source: PubMed Central journal article supplement (PMC4461422; doi:10.1002/ece3.1502), 2015-05-11
Supplement: ece30005-2203-sd1.pdf [file ece30005-2203-sd1.pdf]

**Table S1.** Summary of sampling effort and anti-*Pd* antibody titers for seven North American and two European bat species captured between 2012 and 2014, sorted by season and study location.

Titers are presented as medians followed by range in parentheses.

| Year   | Season   | Location                      | Species                         | <i>n</i>                  | Titer         |
|--------|----------|-------------------------------|---------------------------------|---------------------------|---------------|
| 2012   | Winter   | Germany                       | <i>Myotis myotis</i>            | 14                        | 0 (0-0)       |
| 2013   | Spring   | Kentucky                      | <i>Eptesicus fuscus</i>         | 19                        | 20 (10-37)    |
|        |          |                               | <i>Lasiurus borealis</i>        | 1                         | 10            |
|        |          |                               | <i>Myotis lucifugus</i>         | 21                        | 32 (16-249)   |
|        |          |                               | <i>Myotis septentrionalis</i>   | 20                        | 13 (10-32)    |
|        |          |                               | <i>Perimyotis subflavus</i>     | 19                        | 10 (10-11)    |
|        | Summer   | New York                      | <i>Myotis lucifugus</i>         | 17                        | 54 (22-248)   |
|        |          |                               | Finland                         | <i>Myotis daubentonii</i> | 6             |
|        |          | Kentucky                      | <i>Corynorhinus rafinesquii</i> | 20                        | 10 (10-22)    |
|        |          |                               | <i>Eptesicus fuscus</i>         | 20                        | 13.5 (10-35)  |
|        |          |                               | <i>Lasiurus borealis</i>        | 2                         | 10 (10)       |
| Summer | Kentucky | <i>Myotis lucifugus</i>       | 20                              | 16 (10-43)                |               |
|        |          | <i>Myotis septentrionalis</i> | 17                              | 10 (10-47)                |               |
|        | Finland  | <i>Myotis daubentonii</i>     | 4                               | 10 (10)                   |               |
| 2014   | Winter   | Kentucky                      | <i>Myotis lucifugus</i>         | 20                        | 11.5 (10-122) |
|        |          |                               | <i>Perimyotis subflavus</i>     | 16                        | 10 (10-19)    |
|        | Spring   | Kentucky                      | <i>Corynorhinus rafinesquii</i> | 15                        | 12 (10-51)    |
|        |          |                               | <i>Eptesicus fuscus</i>         | 17                        | 15 (10-208)   |

|              |                               |    |             |
|--------------|-------------------------------|----|-------------|
|              | <i>Lasiurus borealis</i>      | 3  | 19 (10-21)  |
|              | <i>Myotis lucifugus</i>       | 18 | 28 (10-319) |
|              | <i>Myotis septentrionalis</i> | 17 | 17 (10-34)  |
|              | <i>Nycticeius humeralis</i>   | 6  | 10 (10-18)  |
|              | <i>Perimyotis subflavus</i>   | 15 | 10 (10-14)  |
| Pennsylvania | <i>Myotis lucifugus</i>       | 15 | 35 (20-171) |
| Montana      | <i>Myotis lucifugus</i>       | 6  | 10 (10-33)  |

---

**Table S2.** Comparison of anti-*Pd* antibody seroprevalence and titers for four bat species sampling during spring 2013 and 2014 at Mammoth Cave National Park, Kentucky, USA. Data reported are median titers (range in parentheses) and the number of seropositive plasma samples (total sample size in parentheses), alongside Pearson chi-square values testing for difference in prevalence, and Wilcoxon Z testing for differences in median antibody titer, between years. No comparisons were statistically significant ( $P > 0.05$ ).

| Species                       | 2013 Titer  | Positive Samples | 2014 Titer  | Positive Samples | $\chi^2$ | Z     |
|-------------------------------|-------------|------------------|-------------|------------------|----------|-------|
| <i>Eptesicus fuscus</i>       | 20 (10-37)  | 11 (20)          | 15 (10-208) | 12 (17)          | 0.963    | -1.64 |
| <i>Myotis lucifugus</i>       | 32 (16-249) | 21 (21)          | 28 (10-319) | 17 (18)          | 1.197    | -0.80 |
| <i>Myotis septentrionalis</i> | 13 (10-32)  | 14 (20)          | 17 (10-34)  | 12 (17)          | 0.002    | -1.27 |
| <i>Perimyotis subflavus</i>   | 10 (10-11)  | 4 (19)           | 10 (10-14)  | 1 (15)           | 1.554    | -1.10 |

**Table S3.** Comparison of anti-*Pd* antibody seroprevalence and titers for little brown myotis sampled during winter, spring, and summer 2013-2014 in Kentucky, USA. Titers are presented as medians followed by range in parentheses. For each measure, seasons not sharing common letters differed significantly ( $P < 0.05$ ).

| Season | <i>n</i> | Positive Samples | Median Titer             |
|--------|----------|------------------|--------------------------|
| Winter | 20       | 12 <sup>a</sup>  | 12 (10-122) <sup>a</sup> |
| Spring | 39       | 38 <sup>b</sup>  | 32 (10-319) <sup>b</sup> |
| Summer | 20       | 11 <sup>a</sup>  | 16 (10-43) <sup>a</sup>  |

**Table S4.** Comparison of *Pd* loads detected on bat species captured Mammoth Cave National Park, Kentucky, during the spring of 2014. Data are presented as median *Pd* loads (genomic equivalents) plus range in parentheses. Species not sharing common letters differed significantly ( $P < 0.05$ ).

| Species                         | <i>n</i> | <i>Pd</i> load                |
|---------------------------------|----------|-------------------------------|
| <i>Myotis lucifugus</i>         | 18       | 5535 (10-34,555) <sup>a</sup> |
| <i>Myotis septentrionalis</i>   | 17       | 10 (0-14925) <sup>a, b</sup>  |
| <i>Eptesicus fuscus</i>         | 17       | 10 (0-5,699) <sup>b</sup>     |
| <i>Perimyotis subflavus</i>     | 15       | 1157 (0-22,623) <sup>c</sup>  |
| <i>Corynorhinus rafinesquii</i> | 15       | 10 (0-1,527) <sup>b</sup>     |

**Table S5.** Comparison of anti-*Pd* antibody seroprevalence and titers for five species sampled during spring 2013 and 2014 at Mammoth Cave National Park, Kentucky, USA. Titers are presented as medians followed by range in parentheses. For each measure, species not sharing common letters differed significantly ( $P < 0.05$ ).

| Species                         | <i>n</i> | Positive Samples | Titer                    |
|---------------------------------|----------|------------------|--------------------------|
| <i>Myotis lucifugus</i>         | 39       | 39 <sup>a</sup>  | 32 (10-319) <sup>a</sup> |
| <i>Myotis septentrionalis</i>   | 37       | 31 <sup>b</sup>  | 14 (10-48) <sup>b</sup>  |
| <i>Eptesicus fuscus</i>         | 36       | 33 <sup>b</sup>  | 18 (10-46) <sup>b</sup>  |
| <i>Corynorhinus rafinesquii</i> | 15       | 7 <sup>b</sup>   | 10 (10-162) <sup>b</sup> |
| <i>Perimyotis subflavus</i>     | 34       | 5 <sup>c</sup>   | 10 (10-12) <sup>c</sup>  |

**Table S6.** Comparison of anti-*Pd* antibody seroprevalence and titers for little brown myotis sampled at various locations in the United States during spring 2013-2014. Titers are presented as medians followed by range in parentheses. For each measure, seasons not sharing common letters differed significantly ( $P < 0.05$ ).

| Sampling Location | <i>n</i> | WNS Status          | Positive Samples | Titer                      |
|-------------------|----------|---------------------|------------------|----------------------------|
| Montana           | 6        | Negative            | 2 <sup>a</sup>   | 10 (10-33) <sup>a</sup>    |
| Kentucky          | 39       | Positive since 2011 | 38 <sup>b</sup>  | 32 (10-319) <sup>b</sup>   |
| Pennsylvania      | 15       | Positive since 2008 | 15 <sup>b</sup>  | 35 (20-171) <sup>b,c</sup> |
| New York          | 17       | Positive since 2006 | 22 <sup>b</sup>  | 54 (22-428) <sup>c</sup>   |

**Table S7.** Comparison of *Pd* loads detected on little brown bats captured at different regions of the United States during 2013-2014. Data are presented as median *Pd* loads (genomic equivalents) plus range in parentheses. States not sharing common letters differed significantly ( $P < 0.05$ ).

| State        | <i>n</i> | <i>Pd</i> load                |
|--------------|----------|-------------------------------|
| Kentucky     | 18       | 5535 (10-34,555) <sup>a</sup> |
| Pennsylvania | 15       | 12 (0-508) <sup>b</sup>       |
| New York     | 17       | 10 (0-440) <sup>b</sup>       |

**Table S8.** Comparison of anti-*Pd* antibody seroprevalence and titers for three species sampled during hibernation (March 2012 and 2014). Titers are presented as medians followed by range in parentheses. For each measure, species not sharing common letters differed significantly ( $P < 0.05$ ).

| Species                     | <i>n</i> | Sampling Location         | Positive Samples | Titer                    |
|-----------------------------|----------|---------------------------|------------------|--------------------------|
| <i>Myotis lucifugus</i>     | 20       | Kentucky, USA             | 12 <sup>a</sup>  | 12 (10-122) <sup>a</sup> |
| <i>Perimyotis subflavus</i> | 16       | Kentucky, USA             | 1 <sup>b</sup>   | 10 (10-19) <sup>b</sup>  |
| <i>Myotis myotis</i>        | 14       | Northern Bavaria, Germany | 0 <sup>b</sup>   | 10 <sup>b</sup>          |
